# Supplementary material for: Development and validation of a patient-reported outcome measure for systemic sclerosis: the EULAR Systemic Sclerosis Impact of Disease (ScleroID) questionnaire
Source: HighWire-hosted journal article supplement (doi:10.1136/annrheumdis-2021-220702), 2021-11-25
Supplement: annrheumdis-2021-220702supp002_data_supplement.pdf [file annrheumdis-2021-220702supp002_data_supplement.pdf]

**Validation of Scleroid**

COUNTRY \_\_\_\_\_

Patient number /\_\_/\_\_/

**BASELINE – PATIENT CRF**

Today's Date: Day /\_\_/\_\_/ Month /\_\_/\_\_/ Year 20/\_\_/\_\_/

**B1. Impact and weighting of disease**

We want you to indicate how much your systemic sclerosis (scleroderma) impacts your health in the following selected health dimensions, shown below.

Please distribute 100 points between the dimensions according to their impact; the sum should be 100.

Please read all dimensions before starting to distribute your points.

You can spend your points in sets of 5. Give more points to dimensions which have important impact and less to dimensions that are not so important. You do not have to spend points in every area. You cannot spend more than 100 points.

Please take into account your whole disease history, not only how you feel today, when distributing the points.

In this table, you have to distribute your 100 points between 10 domains of health:

| Domain/dimension                                                                                    | POINTS     |
|-----------------------------------------------------------------------------------------------------|------------|
| Raynaud's Phenomenon                                                                                | _ _        |
| Hand function                                                                                       | _ _        |
| Pain                                                                                                | _ _        |
| Fatigue<br>(being tired physically, but also mental fatigue, lack of energy)                        | _ _        |
| Upper gastrointestinal tract symptoms<br>(e.g. swallowing difficulties, reflux, vomiting)           | _ _        |
| Lower gastrointestinal tract symptoms<br>(e.g. bloating, diarrhea, constipation, anal incontinence) | _ _        |
| Limitations of life choices and activities<br>(e.g. social life, personal care, work)               | _ _        |
| Body mobility                                                                                       | _ _        |
| Breathlessness                                                                                      | _ _        |
| Digital ulcers                                                                                      | _ _        |
| <b>TOTAL POINTS: Remember must add up to 100 points</b>                                             | <b>100</b> |

**Validation of Scleroid**

COUNTRY \_\_\_\_\_

Patient number /\_\_/\_/

**B2. The EULAR Scleroderma Impact of Disease Score (Scleroid)**

How much have the different aspects of systemic sclerosis affected you during the last week?  
Please mark your responses on the scale by choosing the appropriate number for each of the following dimensions:

**Raynaud's phenomenon:**

Circle the number that best describes the severity of your Raynaud's phenomenon during the last week:

None 

|   |   |   |   |   |   |   |   |   |   |    |
|---|---|---|---|---|---|---|---|---|---|----|
| 0 | 1 | 2 | 3 | 4 | 5 | 6 | 7 | 8 | 9 | 10 |
|---|---|---|---|---|---|---|---|---|---|----|

 Extreme**Hand function:**

Circle the number that best describes your hand function limitations due to your systemic sclerosis during the last week:

No limitation 

|   |   |   |   |   |   |   |   |   |   |    |
|---|---|---|---|---|---|---|---|---|---|----|
| 0 | 1 | 2 | 3 | 4 | 5 | 6 | 7 | 8 | 9 | 10 |
|---|---|---|---|---|---|---|---|---|---|----|

 Extreme limitation**Upper gastrointestinal tract symptoms (e.g. swallowing difficulties, reflux, vomiting):**

Circle the number that best describes the severity of your upper gastrointestinal tract symptoms due to your systemic sclerosis during the last week:

None 

|   |   |   |   |   |   |   |   |   |   |    |
|---|---|---|---|---|---|---|---|---|---|----|
| 0 | 1 | 2 | 3 | 4 | 5 | 6 | 7 | 8 | 9 | 10 |
|---|---|---|---|---|---|---|---|---|---|----|

 Extreme**Pain:**

Circle the number that best describes the pain you felt due to your systemic sclerosis during the last week:

None 

|   |   |   |   |   |   |   |   |   |   |    |
|---|---|---|---|---|---|---|---|---|---|----|
| 0 | 1 | 2 | 3 | 4 | 5 | 6 | 7 | 8 | 9 | 10 |
|---|---|---|---|---|---|---|---|---|---|----|

 Extreme**Fatigue:**

Circle the number that best describes the impact of overall fatigue due to your systemic sclerosis during the last week:

None 

|   |   |   |   |   |   |   |   |   |   |    |
|---|---|---|---|---|---|---|---|---|---|----|
| 0 | 1 | 2 | 3 | 4 | 5 | 6 | 7 | 8 | 9 | 10 |
|---|---|---|---|---|---|---|---|---|---|----|

 Extreme**Lower gastrointestinal tract symptoms (e.g. bloating, diarrhea, constipation, anal incontinence):**

Circle the number that best describes the severity of lower gastrointestinal tract symptoms during the last week:

None 

|   |   |   |   |   |   |   |   |   |   |    |
|---|---|---|---|---|---|---|---|---|---|----|
| 0 | 1 | 2 | 3 | 4 | 5 | 6 | 7 | 8 | 9 | 10 |
|---|---|---|---|---|---|---|---|---|---|----|

 Extreme**Limitations of life choices and activities (e.g. social life, personal care, work):**

Circle the number that best describes how severe the limitations of life choices and activities due to your systemic sclerosis were during the last week:

No 

|   |   |   |   |   |   |   |   |   |   |    |
|---|---|---|---|---|---|---|---|---|---|----|
| 0 | 1 | 2 | 3 | 4 | 5 | 6 | 7 | 8 | 9 | 10 |
|---|---|---|---|---|---|---|---|---|---|----|

 Extreme

## Validation of Scleroid

COUNTRY \_\_\_\_\_

Patient number /\_\_/\_/

**Body mobility:**

Circle the number that best describes how much your body mobility was affected due to your systemic sclerosis during the last week:

|                 |   |   |   |   |   |   |   |   |   |   |    |                       |
|-----------------|---|---|---|---|---|---|---|---|---|---|----|-----------------------|
| Not<br>affected | 0 | 1 | 2 | 3 | 4 | 5 | 6 | 7 | 8 | 9 | 10 | Extremely<br>affected |
|-----------------|---|---|---|---|---|---|---|---|---|---|----|-----------------------|

**Breathlessness:**

Circle the number that best describes how severe your breathlessness due to systemic sclerosis was during the last week:

|      |   |   |   |   |   |   |   |   |   |   |    |         |
|------|---|---|---|---|---|---|---|---|---|---|----|---------|
| None | 0 | 1 | 2 | 3 | 4 | 5 | 6 | 7 | 8 | 9 | 10 | Extreme |
|------|---|---|---|---|---|---|---|---|---|---|----|---------|

**Digital ulcers:**

Circle the number that best describes how much your digital ulcers affected you overall during the last week:

|      |   |   |   |   |   |   |   |   |   |   |    |         |
|------|---|---|---|---|---|---|---|---|---|---|----|---------|
| None | 0 | 1 | 2 | 3 | 4 | 5 | 6 | 7 | 8 | 9 | 10 | Extreme |
|------|---|---|---|---|---|---|---|---|---|---|----|---------|

**B3. Are you currently .... ?**

- Working full-time or part-time (employed for wages) ☐
- A student ☐
- Retired ☐
- Unable to work/disabled ☐

**B4. What is the highest level of education you completed so far?**

- No schooling ☐
- Elementary/primary school ☐
- High school/middle school **without** university entrance qualification ☐
- High school/middle school **with** university entrance qualification ☐
- College/university **without** degree ☐
- College/university **with** degree – Bachelor (or equivalent) ☐
- College/university **with** degree – Master (or equivalent) ☐
- Doctorate degree ☐
- Trade/technical/vocational training ☐

**Validation of Scleroid**

COUNTRY \_\_\_\_\_

Patient number /\_\_/\_/

**B5. Think about all the ways in which the systemic sclerosis has affected you during the last week, how would you consider this state?** (Mark “X” in only one box below)

- ☐ Very good  
☐ Good  
☐ Acceptable  
☐ Bad  
☐ Very bad

**B6. Think about all the ways your systemic sclerosis has affected you during the last week. Compared to 1 week ago, how has the overall state of your disease been during the last week?** (Mark “X” in only one box below)

- ☐ Much improved  
☐ Moderately improved  
☐ Stable (mostly unchanged)  
☐ Moderately worsened  
☐ Much worsened

**B7. Global assessment**

Considering **all the ways your systemic sclerosis** has affected you during the last week, circle the number that best describes how you have been doing:

|           |   |   |   |   |   |   |   |   |   |   |    |          |
|-----------|---|---|---|---|---|---|---|---|---|---|----|----------|
| Very good | 0 | 1 | 2 | 3 | 4 | 5 | 6 | 7 | 8 | 9 | 10 | Very bad |
|-----------|---|---|---|---|---|---|---|---|---|---|----|----------|

## Validation of Scleroid

COUNTRY \_\_\_\_\_

Patient number /\_\_/\_/

**B8. We are interested in learning how your illness affects your ability to function in daily life. Please check (X) the one best answer which best describes your usual abilities OVER THE PAST WEEK:**

|                                                                | Without<br>ANY<br><u>Difficulty</u> <sup>(0)</sup> | With<br>SOME<br><u>Difficulty</u> <sup>(1)</sup> | With<br>MUCH<br><u>Difficulty</u> <sup>(2)</sup> | UNABLE<br><u>To Do</u> <sup>(3)</sup> |
|----------------------------------------------------------------|----------------------------------------------------|--------------------------------------------------|--------------------------------------------------|---------------------------------------|
| <b>DRESSING &amp; GROOMING</b>                                 |                                                    |                                                  |                                                  |                                       |
| Are you able to:                                               |                                                    |                                                  |                                                  |                                       |
| - Dress yourself, including tying shoelaces and doing buttons? | _____                                              | _____                                            | _____                                            | _____                                 |
| - Shampoo your hair?                                           | _____                                              | _____                                            | _____                                            | _____                                 |
| <b>ARISING</b>                                                 |                                                    |                                                  |                                                  |                                       |
| Are you able to:                                               |                                                    |                                                  |                                                  |                                       |
| - Stand up from a straight chair?                              | _____                                              | _____                                            | _____                                            | _____                                 |
| - Get in and out of bed?                                       | _____                                              | _____                                            | _____                                            | _____                                 |
| <b>EATING</b>                                                  |                                                    |                                                  |                                                  |                                       |
| Are you able to:                                               |                                                    |                                                  |                                                  |                                       |
| - Cut your meat?                                               | _____                                              | _____                                            | _____                                            | _____                                 |
| - Lift a full cup or glass to your mouth?                      | _____                                              | _____                                            | _____                                            | _____                                 |
| - Open a new milk carton?                                      | _____                                              | _____                                            | _____                                            | _____                                 |
| <b>WALKING</b>                                                 |                                                    |                                                  |                                                  |                                       |
| Are you able to:                                               |                                                    |                                                  |                                                  |                                       |
| - Walk outdoors on flat ground?                                | _____                                              | _____                                            | _____                                            | _____                                 |
| - Climb up five steps?                                         | _____                                              | _____                                            | _____                                            | _____                                 |

**Please check any AIDS OR DEVICES that you usually use for any of these activities:**

|                  |                                                                                          |
|------------------|------------------------------------------------------------------------------------------|
| _____ Cane       | _____ Devices used for dressing (button hook, zipper pull, long-handled shoe horn, etc.) |
| _____ Walker     | _____ Built up or special utensils                                                       |
| _____ Crutches   | _____ Special or built up chair                                                          |
| _____ Wheelchair | _____ Other (Specify: _____)                                                             |

**Please check any categories for which you usually need HELP FROM ANOTHER PERSON:**

|                             |               |
|-----------------------------|---------------|
| _____ Dressing and Grooming | _____ Eating  |
| _____ Arising               | _____ Walking |

## Validation of Scleroid

COUNTRY \_\_\_\_\_

Patient number /\_\_/\_/

**Please check the response which best describes your usual abilities OVER THE PAST WEEK:**

|                                                                                           | Without<br>ANY<br><u>Difficulty</u> <sup>(0)</sup> | With<br>SOME<br><u>Difficulty</u> <sup>(1)</sup> | With<br>MUCH<br><u>Difficulty</u> <sup>(2)</sup> | UNABLE<br><u>To Do</u> <sup>(3)</sup> |
|-------------------------------------------------------------------------------------------|----------------------------------------------------|--------------------------------------------------|--------------------------------------------------|---------------------------------------|
| <b>HYGIENE</b>                                                                            |                                                    |                                                  |                                                  |                                       |
| Are you able to:                                                                          |                                                    |                                                  |                                                  |                                       |
| - Wash and dry your body?                                                                 | _____                                              | _____                                            | _____                                            | _____                                 |
| - Take a tub bath?                                                                        | _____                                              | _____                                            | _____                                            | _____                                 |
| - Get on and off the toilet?                                                              | _____                                              | _____                                            | _____                                            | _____                                 |
| <b>REACH</b>                                                                              |                                                    |                                                  |                                                  |                                       |
| Are you able to:                                                                          |                                                    |                                                  |                                                  |                                       |
| - Reach and get down a 5 pound object (such as a bag of sugar) from just above your head? | _____                                              | _____                                            | _____                                            | _____                                 |
| - Bend down to pick up clothing from the floor?                                           | _____                                              | _____                                            | _____                                            | _____                                 |
| <b>GRIP</b>                                                                               |                                                    |                                                  |                                                  |                                       |
| Are you able to:                                                                          |                                                    |                                                  |                                                  |                                       |
| - Open car doors?                                                                         | _____                                              | _____                                            | _____                                            | _____                                 |
| - Open jars which have previously been opened?                                            | _____                                              | _____                                            | _____                                            | _____                                 |
| - Turn faucets on and off?                                                                | _____                                              | _____                                            | _____                                            | _____                                 |
| <b>ACTIVITIES</b>                                                                         |                                                    |                                                  |                                                  |                                       |
| Are you able to:                                                                          |                                                    |                                                  |                                                  |                                       |
| - Run errands and shop?                                                                   | _____                                              | _____                                            | _____                                            | _____                                 |
| - Get in and out of a car?                                                                | _____                                              | _____                                            | _____                                            | _____                                 |
| - Do chores such as vacuuming or yard work?                                               | _____                                              | _____                                            | _____                                            | _____                                 |

**Please check any AIDS OR DEVICES that you usually use for any of these activities:**

|                                               |                                           |
|-----------------------------------------------|-------------------------------------------|
| _____ Raised toilet seat                      | _____ Bathtub bar                         |
| _____ Bathtub seat                            | _____ Long-handled appliances for reach   |
| _____ Jar opener (for jars previously opened) | _____ Long-handled appliances in bathroom |
| _____ Other (Specify: _____)                  |                                           |

**Please check any categories for which you usually need HELP FROM ANOTHER PERSON:**

|               |                                   |
|---------------|-----------------------------------|
| _____ Hygiene | _____ Gripping and opening things |
| _____ Reach   | _____ Errands and chores          |

**IN THE PAST WEEK**, how much have your intestinal problems interfered with your daily activities?

**Validation of SclerolD**

COUNTRY \_\_\_\_\_

Patient number /\_\_/\_/

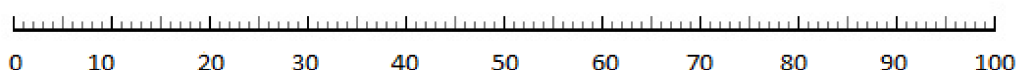

Does not interfere

Very severe limitation

**IN THE PAST WEEK**, how much have your breathing problems interfered with your daily activities?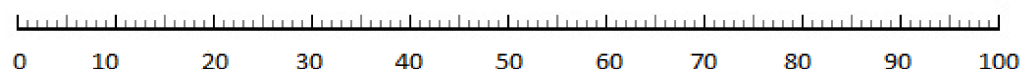

Does not interfere

Very severe limitation

**IN THE PAST WEEK**, how much has Raynaud's interfered with your daily activities?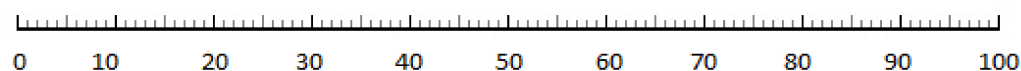

Does not interfere

Very severe limitation

**IN THE PAST WEEK**, how much have your finger ulcers interfered with your daily activities?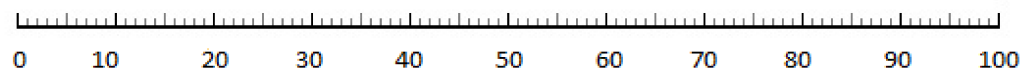

Does not interfere

Very severe limitation

**B9. EQ-5D****By placing a tick in each group below, please indicate which statements best describe your own health state today.****Mobility**I have no problems in walking about ☐I have some problems in walking about ☐I am confined to bed ☐**Self-care**I have no problems with self-care ☐I have some problems washing or dressing myself ☐I am unable to wash or dress myself ☐**Usual activities (eg work, study, housework, family or leisure activities)**

## Validation of Scleroid

COUNTRY \_\_\_\_\_

Patient number /\_\_/\_/

I have no problems with performing my usual activities ☐I have some problems with performing my usual activities ☐I am unable to perform my usual activities ☐**Pain / discomfort**I have no pain or discomfort ☐I have moderate pain or discomfort ☐I have extreme pain or discomfort ☐**Anxiety / depression**I am not anxious or depressed ☐I am moderately anxious or depressed ☐I am extremely anxious or depressed ☐**B10. Overall assessment of health status (SF-36)**

|                                                                             |   |
|-----------------------------------------------------------------------------|---|
| 1. In general, would you say your health is:                                |   |
| Excellent                                                                   | 1 |
| Very good                                                                   | 2 |
| Good                                                                        | 3 |
| Fair                                                                        | 4 |
| Poor                                                                        | 5 |
| 2. Compared to one year ago, how would you rate your health in general now? |   |
| Much better now than one year ago                                           | 1 |
| Somewhat better now than one year ago                                       | 2 |
| About the same                                                              | 3 |
| Somewhat worse now than one year ago                                        | 4 |
| Much worse now than one year ago                                            | 5 |

The following items are about activities you might do during a typical day. Does **your health now limit you** in these activities? If so, how much?

**(Circle One Number on Each Line)**Yes,  
Limited a  
LotYes,  
Limited a  
LittleNo, Not  
limited at  
All



### Validation of Scleroid

| COUNTRY _____                                                                                              | Patient number / __/ __/ |     |     |
|------------------------------------------------------------------------------------------------------------|--------------------------|-----|-----|
| 3. <b>Vigorous activities</b> , such as running, lifting heavy objects, participating in strenuous sports  | [1]                      | [2] | [3] |
| 4. <b>Moderate activities</b> , such as moving a table, pushing a vacuum cleaner, bowling, or playing golf | [1]                      | [2] | [3] |
| 5. Lifting or carrying groceries                                                                           | [1]                      | [2] | [3] |
| 6. Climbing <b>several</b> flights of stairs                                                               | [1]                      | [2] | [3] |
| 7. Climbing <b>one</b> flight of stairs                                                                    | [1]                      | [2] | [3] |
| 8. Bending, kneeling, or stooping                                                                          | [1]                      | [2] | [3] |
| 9. Walking <b>more than a mile</b>                                                                         | [1]                      | [2] | [3] |
| 10. Walking <b>several blocks</b>                                                                          | [1]                      | [2] | [3] |
| 11. Walking <b>one block</b>                                                                               | [1]                      | [2] | [3] |
| 12. Bathing or dressing yourself                                                                           | [1]                      | [2] | [3] |

During the **past 4 weeks**, have you had any of the following problems with your work or other regular daily activities **as a result of your physical health**?

**(Circle One Number on Each Line)**

|                                                                                                       | Yes | No |
|-------------------------------------------------------------------------------------------------------|-----|----|
| 13. Cut down the amount of time you spent on work or other activities                                 | 1   | 2  |
| 14. <b>Accomplished less</b> than you would like                                                      | 1   | 2  |
| 15. Were limited in the <b>kind</b> of work or other activities                                       | 1   | 2  |
| 16. Had <b>difficulty</b> performing the work or other activities (for example, it took extra effort) | 1   | 2  |

During the **past 4 weeks**, have you had any of the following problems with your work or other regular daily activities **as a result of any emotional problems**(such as feeling depressed or anxious)? **(Circle One Number on Each Line)**

Yes No

---

**Validation of Scleroid****COUNTRY** \_\_\_\_\_**Patient number** /\_\_/\_/17. Cut down the **amount of time** you spent on work or other activities      1      218. **Accomplished less** than you would like      1      219. Didn't do work or other activities as **carefully** as usual      1      2

20. During the **past 4 weeks**, to what extent has your physical health or emotional problems interfered with your normal social activities with family, friends, neighbors, or groups? **(Circle One Number)**

Not at all      1

Slightly      2

Moderately      3

Quite a bit      4

Extremely      5

21. How much **bodily** pain have you had during the **past 4 weeks**?

**(Circle One Number)**

None      1

Very mild      2

Mild      3

Moderate      4

Severe      5

Very severe      6

22. During the **past 4 weeks**, how much did **pain** interfere with your normal work (including both work outside the home and housework)? **(Circle One Number)**

Not at all      1

A little bit      2

Moderately      3

## Validation of Scleroid

COUNTRY \_\_\_\_\_

Patient number / \_\_/ \_\_/

Quite a bit                      4

Extremely                      5

These questions are about how you feel and how things have been with you **during the past 4 weeks**. For each question, please give the one answer that comes closest to the way you have been feeling. **(Circle One Number on Each Line)**

How much of the time during the **past 4 weeks** . . .

|                                                                         | All of<br>the<br>Time | Most<br>of the<br>Time | A Good<br>Bit of the<br>Time | Some<br>of the<br>Time | A Little<br>of the<br>Time | None<br>of the<br>Time |
|-------------------------------------------------------------------------|-----------------------|------------------------|------------------------------|------------------------|----------------------------|------------------------|
| 23. Did you feel full of pep?                                           | 1                     | 2                      | 3                            | 4                      | 5                          | 6                      |
| 24. Have you been a very nervous person?                                | 1                     | 2                      | 3                            | 4                      | 5                          | 6                      |
| 25. Have you felt so down in the dumps that nothing could cheer you up? | 1                     | 2                      | 3                            | 4                      | 5                          | 6                      |
| 26. Have you felt calm and peaceful?                                    | 1                     | 2                      | 3                            | 4                      | 5                          | 6                      |
| 27. Did you have a lot of energy?                                       | 1                     | 2                      | 3                            | 4                      | 5                          | 6                      |
| 28. Have you felt downhearted and blue?                                 | 1                     | 2                      | 3                            | 4                      | 5                          | 6                      |
| 29. Did you feel worn out?                                              | 1                     | 2                      | 3                            | 4                      | 5                          | 6                      |
| 30. Have you been a happy person?                                       | 1                     | 2                      | 3                            | 4                      | 5                          | 6                      |
| 31. Did you feel tired?                                                 | 1                     | 2                      | 3                            | 4                      | 5                          | 6                      |

32. During the **past 4 weeks**, how much of the time has your **physical health or emotional problems** interfered with your social activities (like visiting with friends, relatives, etc.)? **(Circle One Number)**

All of the time                      1

### Validation of Scleroid

COUNTRY \_\_\_\_\_

Patient number / \_\_ / \_\_ /

Most of the time                      2

Some of the time                      3

A little of the time                      4

None of the time                      5

How TRUE or FALSE is each of the following statements for you.

**(Circle One Number on Each Line)**

|                                                          | Definitely<br>True | Mostly<br>True | Don't<br>Know | Mostly<br>False | Definitely<br>False |
|----------------------------------------------------------|--------------------|----------------|---------------|-----------------|---------------------|
| 33. I seem to get sick a little easier than other people | 1                  | 2              | 3             | 4               | 5                   |
| 34. I am as healthy as anybody I know                    | 1                  | 2              | 3             | 4               | 5                   |
| 35. I expect my health to get worse                      | 1                  | 2              | 3             | 4               | 5                   |
| 36. My health is excellent                               | 1                  | 2              | 3             | 4               | 5                   |

|                                                    |
|----------------------------------------------------|
| <b>Thank you for filling in this questionnaire</b> |
|----------------------------------------------------|

---

**Validation of Scleroid**

COUNTRY \_\_\_\_\_

Patient number /\_\_/\_/

---

**Baseline physician CRF****G1. Today's Date:** Day /\_\_/\_/ Month /\_\_/\_/ Year 20/\_\_/\_/**G2. Do you confirm the main inclusion and exclusion criteria?**

|                                                                                                                                                                                                     | Yes                      | No                       |
|-----------------------------------------------------------------------------------------------------------------------------------------------------------------------------------------------------|--------------------------|--------------------------|
| G2.1. Age $\geq$ 18 years .....                                                                                                                                                                     | <input type="checkbox"/> | <input type="checkbox"/> |
| G2.2. Able to understand the objectives of the study and the different questionnaires .....                                                                                                         | <input type="checkbox"/> | <input type="checkbox"/> |
| G2.3. Written informed consent obtained .....                                                                                                                                                       | <input type="checkbox"/> | <input type="checkbox"/> |
| G2.4. Patient fulfilling the ACR/EULAR 2013 criteria for SSc.....                                                                                                                                   | <input type="checkbox"/> | <input type="checkbox"/> |
| G2.5. No severe comorbidity NOT related to SSc .....<br>(e.g. concomitant acute infectious disease, organ failure, recent acute cerebrovascular event, serious psychiatric or neurological disease) | <input type="checkbox"/> | <input type="checkbox"/> |

***Any negative answer results in the non-inclusion of the patient in the study.***

---

**G3. SSc characteristics**

**Please make sure that all necessary items of the EUSTAR dataset are evaluated and filled into the system (date of birth and diagnosis, clinical features, laboratory values, therapies etc.) AND that the patient fills in the necessary questionnaires/CRF.**

**Validation of Scleroid**

COUNTRY \_\_\_\_\_

Patient number /\_\_/\_/

**G4. Physician's assessment of SSc****G4.1. Physician's global assessment of SSc**

Considering all the ways systemic sclerosis has affected your patient during the last week, circle the number that best describes how he/she has been doing:

|           |   |   |   |   |   |   |   |   |   |   |    |          |
|-----------|---|---|---|---|---|---|---|---|---|---|----|----------|
| Very good | 0 | 1 | 2 | 3 | 4 | 5 | 6 | 7 | 8 | 9 | 10 | Very bad |
|-----------|---|---|---|---|---|---|---|---|---|---|----|----------|

**At the end of this visit, please check:****1. Is the patient eligible for the RELIABILITY ARM?**

Eligibility criteria for the reliability arm:

- willingness to fill in the Reliability CRF after 7 +/- 3 days from the baseline visit (this can be sent per post, e-mail, or handed to the patient, as suitable)
- no major health change/intervention is medically foreseeable/planned during the next 10 days

**If the above conditions are fulfilled, please include the patient in the Reliability arm (see Reliability study - Physician CRF and Reliability Study – Patient CRF).**

**2. Is the patient eligible for the SENSITIVITY TO CHANGE ARM?**

Eligibility criteria for the sensitivity to change arm:

- patients with active disease as defined by the physician
- feasible follow-up visits at 6 and 12 months (or at least one complete follow-up visit at 12 months), as medically required

**If the above conditions are fulfilled, please include the patient in the Sensitivity to change arm.**

**3. IN ANY CASE, PLEASE CHECK PATIENT CRF and EUSTAR dataset FOR COMPLETENESS and fill in patient number!****THANK YOU!**

---

**Validation of Scleroid****COUNTRY** \_\_\_\_\_**Patient number** /\_\_/\_/

---

**Validation of Scleroid**

COUNTRY \_\_\_\_\_

Patient number /\_\_/\_/

**RELIABILITY STUDY – PATIENT CRF****Please fill in this questionnaire 7+/-3 days after your last visit.****Today's Date:** Day /\_\_/\_/ Month /\_\_/\_/ Year 20/\_\_/\_/

Please cross the correct answer:

S1. Since you last filled in this questionnaire, do you consider your systemic sclerosis to be stable? .....yes ☐ no ☐

S2. Since you last filled in this questionnaire, has your treatment for your systemic sclerosis been changed? .....yes ☐ no ☐

**S3. Think about all the ways in which the systemic sclerosis has affected you during the last week, how would you consider this state? (Mark "X" in only one box below)**

- ☐ Very good
- ☐ Good
- ☐ Acceptable
- ☐ Bad
- ☐ Very bad

S4. Think about all the ways your systemic sclerosis has affected you during the last week.

**Compared to 1 week ago, how has the overall state of your disease been during the last week? (Mark "X" in only one box below)**

- ☐ Much improved
- ☐ Moderately improved
- ☐ Stable (mostly unchanged)
- ☐ Moderately worsened
- ☐ Much worsened



**Validation of Scleroid**

COUNTRY \_\_\_\_\_

Patient number /\_\_/\_/

**S5. The EULAR Scleroderma Impact of Disease Score (Scleroid)**

How much have the different aspects of systemic sclerosis affected you during the last week?  
Please mark your responses on the scale by choosing the appropriate number for each of the following dimensions:

**Raynaud's phenomenon:**

Circle the number that best describes the severity of your Raynaud's phenomenon during the last week:

None 

|   |   |   |   |   |   |   |   |   |   |    |
|---|---|---|---|---|---|---|---|---|---|----|
| 0 | 1 | 2 | 3 | 4 | 5 | 6 | 7 | 8 | 9 | 10 |
|---|---|---|---|---|---|---|---|---|---|----|

 Extreme**Hand function:**

Circle the number that best describes your hand function limitations due to your systemic sclerosis during the last week:

No limitation 

|   |   |   |   |   |   |   |   |   |   |    |
|---|---|---|---|---|---|---|---|---|---|----|
| 0 | 1 | 2 | 3 | 4 | 5 | 6 | 7 | 8 | 9 | 10 |
|---|---|---|---|---|---|---|---|---|---|----|

 Extreme limitation**Upper gastrointestinal tract symptoms (e.g. swallowing difficulties, reflux, vomiting):**

Circle the number that best describes the severity of your upper gastrointestinal tract symptoms due to your systemic sclerosis during the last week:

None 

|   |   |   |   |   |   |   |   |   |   |    |
|---|---|---|---|---|---|---|---|---|---|----|
| 0 | 1 | 2 | 3 | 4 | 5 | 6 | 7 | 8 | 9 | 10 |
|---|---|---|---|---|---|---|---|---|---|----|

 Extreme**Pain:**

Circle the number that best describes the pain you felt due to your systemic sclerosis during the last week:

None 

|   |   |   |   |   |   |   |   |   |   |    |
|---|---|---|---|---|---|---|---|---|---|----|
| 0 | 1 | 2 | 3 | 4 | 5 | 6 | 7 | 8 | 9 | 10 |
|---|---|---|---|---|---|---|---|---|---|----|

 Extreme**Fatigue:**

Circle the number that best describes the impact of overall fatigue due to your systemic sclerosis during the last week:

None 

|   |   |   |   |   |   |   |   |   |   |    |
|---|---|---|---|---|---|---|---|---|---|----|
| 0 | 1 | 2 | 3 | 4 | 5 | 6 | 7 | 8 | 9 | 10 |
|---|---|---|---|---|---|---|---|---|---|----|

 Extreme**Lower gastrointestinal tract symptoms (e.g. bloating, diarrhea, constipation, anal incontinence):**

Circle the number that best describes the severity of lower gastrointestinal tract symptoms during the last week:

None 

|   |   |   |   |   |   |   |   |   |   |    |
|---|---|---|---|---|---|---|---|---|---|----|
| 0 | 1 | 2 | 3 | 4 | 5 | 6 | 7 | 8 | 9 | 10 |
|---|---|---|---|---|---|---|---|---|---|----|

 Extreme**Limitations of life choices and activities (e.g. social life, personal care, work):**

Circle the number that best describes how severe the limitations of life choices and activities due to your systemic sclerosis were during the last week:

No 

|   |   |   |   |   |   |   |   |   |   |    |
|---|---|---|---|---|---|---|---|---|---|----|
| 0 | 1 | 2 | 3 | 4 | 5 | 6 | 7 | 8 | 9 | 10 |
|---|---|---|---|---|---|---|---|---|---|----|

 Extreme

**Validation of Scleroid**

COUNTRY \_\_\_\_\_

Patient number /\_\_/\_/

**Body mobility:**

Circle the number that best describes how much your body mobility was affected due to your systemic sclerosis during the last week:

|              |   |   |   |   |   |   |   |   |   |   |    |                    |
|--------------|---|---|---|---|---|---|---|---|---|---|----|--------------------|
| Not affected | 0 | 1 | 2 | 3 | 4 | 5 | 6 | 7 | 8 | 9 | 10 | Extremely affected |
|--------------|---|---|---|---|---|---|---|---|---|---|----|--------------------|

**Breathlessness:**

Circle the number that best describes how severe your breathlessness due to systemic sclerosis was during the last week:

|      |   |   |   |   |   |   |   |   |   |   |    |         |
|------|---|---|---|---|---|---|---|---|---|---|----|---------|
| None | 0 | 1 | 2 | 3 | 4 | 5 | 6 | 7 | 8 | 9 | 10 | Extreme |
|------|---|---|---|---|---|---|---|---|---|---|----|---------|

**Digital ulcers:**

Circle the number that best describes how much your digital ulcers affected you overall during the last week:

|      |   |   |   |   |   |   |   |   |   |   |    |         |
|------|---|---|---|---|---|---|---|---|---|---|----|---------|
| None | 0 | 1 | 2 | 3 | 4 | 5 | 6 | 7 | 8 | 9 | 10 | Extreme |
|------|---|---|---|---|---|---|---|---|---|---|----|---------|

**S6. Global assessment**

Considering **all the ways your systemic sclerosis** has affected you during the last week, circle the number that best describes how you have been doing:

|           |   |   |   |   |   |   |   |   |   |   |    |          |
|-----------|---|---|---|---|---|---|---|---|---|---|----|----------|
| Very good | 0 | 1 | 2 | 3 | 4 | 5 | 6 | 7 | 8 | 9 | 10 | Very bad |
|-----------|---|---|---|---|---|---|---|---|---|---|----|----------|

## Validation of Scleroid

COUNTRY \_\_\_\_\_

Patient number /\_\_/\_/

**S7. We are interested in learning how your illness affects your ability to function in daily life. Please check (X) the one best answer which best describes your usual abilities OVER THE PAST WEEK:**

|                                                                | Without<br>ANY<br>Difficulty <sup>(0)</sup> | With<br>SOME<br>Difficulty <sup>(1)</sup> | With<br>MUCH<br>Difficulty <sup>(2)</sup> | UNABLE<br>To Do <sup>(3)</sup> |
|----------------------------------------------------------------|---------------------------------------------|-------------------------------------------|-------------------------------------------|--------------------------------|
| <b>DRESSING &amp; GROOMING</b>                                 |                                             |                                           |                                           |                                |
| Are you able to:                                               |                                             |                                           |                                           |                                |
| - Dress yourself, including tying shoelaces and doing buttons? | _____                                       | _____                                     | _____                                     | _____                          |
| - Shampoo your hair?                                           | _____                                       | _____                                     | _____                                     | _____                          |
| <b>ARISING</b>                                                 |                                             |                                           |                                           |                                |
| Are you able to:                                               |                                             |                                           |                                           |                                |
| - Stand up from a straight chair?                              | _____                                       | _____                                     | _____                                     | _____                          |
| - Get in and out of bed?                                       | _____                                       | _____                                     | _____                                     | _____                          |
| <b>EATING</b>                                                  |                                             |                                           |                                           |                                |
| Are you able to:                                               |                                             |                                           |                                           |                                |
| - Cut your meat?                                               | _____                                       | _____                                     | _____                                     | _____                          |
| - Lift a full cup or glass to your mouth?                      | _____                                       | _____                                     | _____                                     | _____                          |
| - Open a new milk carton?                                      | _____                                       | _____                                     | _____                                     | _____                          |
| <b>WALKING</b>                                                 |                                             |                                           |                                           |                                |
| Are you able to:                                               |                                             |                                           |                                           |                                |
| - Walk outdoors on flat ground?                                | _____                                       | _____                                     | _____                                     | _____                          |
| - Climb up five steps?                                         | _____                                       | _____                                     | _____                                     | _____                          |

**Please check any AIDS OR DEVICES that you usually use for any of these activities:**

|                  |                                                                                          |
|------------------|------------------------------------------------------------------------------------------|
| _____ Cane       | _____ Devices used for dressing (button hook, zipper pull, long-handled shoe horn, etc.) |
| _____ Walker     | _____ Built up or special utensils                                                       |
| _____ Crutches   | _____ Special or built up chair                                                          |
| _____ Wheelchair | _____ Other (Specify: _____)                                                             |

**Please check any categories for which you usually need HELP FROM ANOTHER PERSON:**

|                             |               |
|-----------------------------|---------------|
| _____ Dressing and Grooming | _____ Eating  |
| _____ Arising               | _____ Walking |

## Validation of Scleroid

COUNTRY \_\_\_\_\_

Patient number /\_\_/\_/

**Please check the response which best describes your usual abilities OVER THE PAST WEEK:**

|                                                                                           | Without<br>ANY<br><u>Difficulty</u> <sup>(0)</sup> | With<br>SOME<br><u>Difficulty</u> <sup>(1)</sup> | With<br>MUCH<br><u>Difficulty</u> <sup>(2)</sup> | UNABLE<br><u>To Do</u> <sup>(3)</sup> |
|-------------------------------------------------------------------------------------------|----------------------------------------------------|--------------------------------------------------|--------------------------------------------------|---------------------------------------|
| <b>HYGIENE</b>                                                                            |                                                    |                                                  |                                                  |                                       |
| Are you able to:                                                                          |                                                    |                                                  |                                                  |                                       |
| - Wash and dry your body?                                                                 | _____                                              | _____                                            | _____                                            | _____                                 |
| - Take a tub bath?                                                                        | _____                                              | _____                                            | _____                                            | _____                                 |
| - Get on and off the toilet?                                                              | _____                                              | _____                                            | _____                                            | _____                                 |
| <b>REACH</b>                                                                              |                                                    |                                                  |                                                  |                                       |
| Are you able to:                                                                          |                                                    |                                                  |                                                  |                                       |
| - Reach and get down a 5 pound object (such as a bag of sugar) from just above your head? | _____                                              | _____                                            | _____                                            | _____                                 |
| - Bend down to pick up clothing from the floor?                                           | _____                                              | _____                                            | _____                                            | _____                                 |
| <b>GRIP</b>                                                                               |                                                    |                                                  |                                                  |                                       |
| Are you able to:                                                                          |                                                    |                                                  |                                                  |                                       |
| - Open car doors?                                                                         | _____                                              | _____                                            | _____                                            | _____                                 |
| - Open jars which have previously been opened?                                            | _____                                              | _____                                            | _____                                            | _____                                 |
| - Turn faucets on and off?                                                                | _____                                              | _____                                            | _____                                            | _____                                 |
| <b>ACTIVITIES</b>                                                                         |                                                    |                                                  |                                                  |                                       |
| Are you able to:                                                                          |                                                    |                                                  |                                                  |                                       |
| - Run errands and shop?                                                                   | _____                                              | _____                                            | _____                                            | _____                                 |
| - Get in and out of a car?                                                                | _____                                              | _____                                            | _____                                            | _____                                 |
| - Do chores such as vacuuming or yard work?                                               | _____                                              | _____                                            | _____                                            | _____                                 |

**Please check any AIDS OR DEVICES that you usually use for any of these activities:**

|                                               |                                           |
|-----------------------------------------------|-------------------------------------------|
| _____ Raised toilet seat                      | _____ Bathtub bar                         |
| _____ Bathtub seat                            | _____ Long-handled appliances for reach   |
| _____ Jar opener (for jars previously opened) | _____ Long-handled appliances in bathroom |
| _____ Other (Specify: _____)                  |                                           |

**Please check any categories for which you usually need HELP FROM ANOTHER PERSON:**

|               |                                   |
|---------------|-----------------------------------|
| _____ Hygiene | _____ Gripping and opening things |
| _____ Reach   | _____ Errands and chores          |

**IN THE PAST WEEK**, how much have your intestinal problems interfered with your daily activities?

**Validation of SclerolD**

COUNTRY \_\_\_\_\_

Patient number /\_\_/\_/

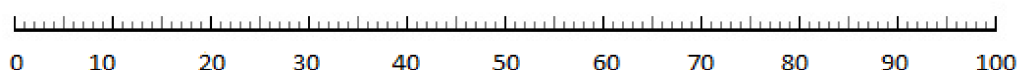

Does not interfere

Very severe limitation

**IN THE PAST WEEK**, how much have your breathing problems interfered with your daily activities?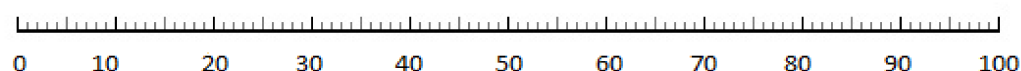

Does not interfere

Very severe limitation

**IN THE PAST WEEK**, how much has Raynaud's interfered with your daily activities?

Does not interfere

Very severe limitation

**IN THE PAST WEEK**, how much have your finger ulcers interfered with your daily activities?

Does not interfere

Very severe limitation

S8. EQ-5D

**By placing a tick in each group below, please indicate which statements best describe your own health state today.****Mobility**I have no problems in walking about ☐I have some problems in walking about ☐I am confined to bed ☐**Self-care**I have no problems with self-care ☐I have some problems washing or dressing myself ☐I am unable to wash or dress myself ☐**Usual activities (eg work, study, housework, family or leisure activities)**

## Validation of Scleroid

COUNTRY \_\_\_\_\_

Patient number /\_\_/\_/

I have no problems with performing my usual activities ☐I have some problems with performing my usual activities ☐I am unable to perform my usual activities ☐**Pain / discomfort**I have no pain or discomfort ☐I have moderate pain or discomfort ☐I have extreme pain or discomfort ☐**Anxiety / depression**I am not anxious or depressed ☐I am moderately anxious or depressed ☐I am extremely anxious or depressed ☐**P10. Overall assessment of health status (SF-36)**

|                                                                             |   |
|-----------------------------------------------------------------------------|---|
| 1. In general, would you say your health is:                                |   |
| Excellent                                                                   | 1 |
| Very good                                                                   | 2 |
| Good                                                                        | 3 |
| Fair                                                                        | 4 |
| Poor                                                                        | 5 |
| 2. Compared to one year ago, how would you rate your health in general now? |   |
| Much better now than one year ago                                           | 1 |
| Somewhat better now than one year ago                                       | 2 |
| About the same                                                              | 3 |
| Somewhat worse now than one year ago                                        | 4 |
| Much worse now than one year ago                                            | 5 |

The following items are about activities you might do during a typical day. Does **your health now limit you** in these activities? If so, how much?

**(Circle One Number on Each Line)**Yes,  
Limited a  
LotYes,  
Limited a  
LittleNo, Not  
limited at  
All

### Validation of Scleroid

| COUNTRY _____                                                                                              | Patient number / __/__/ |     |     |
|------------------------------------------------------------------------------------------------------------|-------------------------|-----|-----|
| 3. <b>Vigorous activities</b> , such as running, lifting heavy objects, participating in strenuous sports  | [1]                     | [2] | [3] |
| 4. <b>Moderate activities</b> , such as moving a table, pushing a vacuum cleaner, bowling, or playing golf | [1]                     | [2] | [3] |
| 5. Lifting or carrying groceries                                                                           | [1]                     | [2] | [3] |
| 6. Climbing <b>several</b> flights of stairs                                                               | [1]                     | [2] | [3] |
| 7. Climbing <b>one</b> flight of stairs                                                                    | [1]                     | [2] | [3] |
| 8. Bending, kneeling, or stooping                                                                          | [1]                     | [2] | [3] |
| 9. Walking <b>more than a mile</b>                                                                         | [1]                     | [2] | [3] |
| 10. Walking <b>several blocks</b>                                                                          | [1]                     | [2] | [3] |
| 11. Walking <b>one block</b>                                                                               | [1]                     | [2] | [3] |
| 12. Bathing or dressing yourself                                                                           | [1]                     | [2] | [3] |

During the **past 4 weeks**, have you had any of the following problems with your work or other regular daily activities **as a result of your physical health**?

**(Circle One Number on Each Line)**

|                                                                                                       | Yes | No |
|-------------------------------------------------------------------------------------------------------|-----|----|
| 13. Cut down the amount of time you spent on work or other activities                                 | 1   | 2  |
| 14. <b>Accomplished less</b> than you would like                                                      | 1   | 2  |
| 15. Were limited in the <b>kind</b> of work or other activities                                       | 1   | 2  |
| 16. Had <b>difficulty</b> performing the work or other activities (for example, it took extra effort) | 1   | 2  |

During the **past 4 weeks**, have you had any of the following problems with your work or other regular daily activities **as a result of any emotional problems**(such as feeling depressed or anxious)? **(Circle One Number on Each Line)**

Yes No

---

**Validation of Scleroid****COUNTRY** \_\_\_\_\_**Patient number** /\_\_/\_/17. Cut down the **amount of time** you spent on work or other activities      1      218. **Accomplished less** than you would like      1      219. Didn't do work or other activities as **carefully** as usual      1      2

20. During the **past 4 weeks**, to what extent has your physical health or emotional problems interfered with your normal social activities with family, friends, neighbors, or groups? **(Circle One Number)**

Not at all      1

Slightly      2

Moderately      3

Quite a bit      4

Extremely      5

21. How much **bodily** pain have you had during the **past 4 weeks**?

**(Circle One Number)**

None      1

Very mild      2

Mild      3

Moderate      4

Severe      5

Very severe      6

22. During the **past 4 weeks**, how much did **pain** interfere with your normal work (including both work outside the home and housework)? **(Circle One Number)**

Not at all      1

A little bit      2

Moderately      3



## Validation of Scleroid

COUNTRY \_\_\_\_\_

Patient number / \_\_/ \_\_/

Quite a bit                      4

Extremely                      5

These questions are about how you feel and how things have been with you **during the past 4 weeks**. For each question, please give the one answer that comes closest to the way you have been feeling. **(Circle One Number on Each Line)**

How much of the time during the **past 4 weeks** . . .

|                                                                         | All of<br>the<br>Time | Most<br>of the<br>Time | A Good<br>Bit of the<br>Time | Some<br>of the<br>Time | A Little<br>of the<br>Time | None<br>of the<br>Time |
|-------------------------------------------------------------------------|-----------------------|------------------------|------------------------------|------------------------|----------------------------|------------------------|
| 23. Did you feel full of pep?                                           | 1                     | 2                      | 3                            | 4                      | 5                          | 6                      |
| 24. Have you been a very nervous person?                                | 1                     | 2                      | 3                            | 4                      | 5                          | 6                      |
| 25. Have you felt so down in the dumps that nothing could cheer you up? | 1                     | 2                      | 3                            | 4                      | 5                          | 6                      |
| 26. Have you felt calm and peaceful?                                    | 1                     | 2                      | 3                            | 4                      | 5                          | 6                      |
| 27. Did you have a lot of energy?                                       | 1                     | 2                      | 3                            | 4                      | 5                          | 6                      |
| 28. Have you felt downhearted and blue?                                 | 1                     | 2                      | 3                            | 4                      | 5                          | 6                      |
| 29. Did you feel worn out?                                              | 1                     | 2                      | 3                            | 4                      | 5                          | 6                      |
| 30. Have you been a happy person?                                       | 1                     | 2                      | 3                            | 4                      | 5                          | 6                      |
| 31. Did you feel tired?                                                 | 1                     | 2                      | 3                            | 4                      | 5                          | 6                      |

32. During the **past 4 weeks**, how much of the time has your **physical health or emotional problems** interfered with your social activities (like visiting with friends, relatives, etc.)? **(Circle One Number)**

All of the time                      1

### Validation of Scleroid

COUNTRY \_\_\_\_\_

Patient number / \_\_/ \_\_/

Most of the time                      2

Some of the time                      3

A little of the time                      4

None of the time                      5

How TRUE or FALSE is each of the following statements for you.

**(Circle One Number on Each Line)**

|                                                          | Definitely<br>True | Mostly<br>True | Don't<br>Know | Mostly<br>False | Definitely<br>False |
|----------------------------------------------------------|--------------------|----------------|---------------|-----------------|---------------------|
| 33. I seem to get sick a little easier than other people | 1                  | 2              | 3             | 4               | 5                   |
| 34. I am as healthy as anybody I know                    | 1                  | 2              | 3             | 4               | 5                   |
| 35. I expect my health to get worse                      | 1                  | 2              | 3             | 4               | 5                   |
| 36. My health is excellent                               | 1                  | 2              | 3             | 4               | 5                   |

|                                                    |
|----------------------------------------------------|
| <b>Thank you for filling in this questionnaire</b> |
|----------------------------------------------------|

---

**Validation of Scleroid**

COUNTRY \_\_\_\_\_

Patient number /\_\_/\_/

**RELIABILITY STUDY – PHYSICIAN CRF**

(to be filled in 7+/-3 days after the baseline visit)

**R1. Date of the visit**      /\_\_/\_/ /\_\_/\_/ 20\_\_  
                                         day    month    year

should be 7 days after the baseline visit ( $\pm 3$  days)**R2. Do you confirm the main inclusion criteria?**

|                                                                                                         | Yes                      | No                       |
|---------------------------------------------------------------------------------------------------------|--------------------------|--------------------------|
| R2.1. willingness to fill in the Reliability CRF after 7 +/- 3 days .....                               | <input type="checkbox"/> | <input type="checkbox"/> |
| R2.2. no major health change/medical intervention is<br>forseeable/planned during the next 10 days..... | <input type="checkbox"/> | <input type="checkbox"/> |

*A negative answer to question 2.1 or 2.2 results in the non-inclusion of the patient in the reliability study.*

**Validation of Scleroid**

COUNTRY \_\_\_\_\_

Patient number /\_\_/\_/

**SENSITIVITY TO CHANGE STUDY – PATIENT CRF****Today's Date:** Day /\_\_/\_/ Month /\_\_/\_/ Year 20/\_\_/\_/

Please cross the correct answer:

S1. Since you last filled in this questionnaire, do you consider your systemic sclerosis to be stable? ..... yes ☐ no ☐

S2. Since you last filled in this questionnaire, has your treatment for your systemic sclerosis been changed? ..... yes ☐ no ☐

**S3. Think about all the ways in which the systemic sclerosis has affected you during the last week, how would you consider this state? (Mark "X" in only one box below)**

☐ Very good☐ Good☐ Acceptable☐ Bad☐ Very bad

S4. Think about all the ways your systemic sclerosis has affected you during the last week.

**Compared to 6 months ago, how has the overall state of your disease been during the last week? (Mark "X" in only one box below)**

☐ Much improved☐ Moderately improved☐ Stable (mostly unchanged)☐ Moderately worsened☐ Much worsened

**Validation of Scleroid**

COUNTRY \_\_\_\_\_

Patient number /\_\_/\_/

**S5. The EULAR Scleroderma Impact of Disease Score (Scleroid)**

How much have the different aspects of systemic sclerosis affected you during the last week?  
Please mark your responses on the scale by choosing the appropriate number for each of the following dimensions:

**Raynaud's phenomenon:**

Circle the number that best describes the severity of your Raynaud's phenomenon during the last week:

None 

|   |   |   |   |   |   |   |   |   |   |    |
|---|---|---|---|---|---|---|---|---|---|----|
| 0 | 1 | 2 | 3 | 4 | 5 | 6 | 7 | 8 | 9 | 10 |
|---|---|---|---|---|---|---|---|---|---|----|

 Extreme**Hand function:**

Circle the number that best describes your hand function limitations due to your systemic sclerosis during the last week:

No limitation 

|   |   |   |   |   |   |   |   |   |   |    |
|---|---|---|---|---|---|---|---|---|---|----|
| 0 | 1 | 2 | 3 | 4 | 5 | 6 | 7 | 8 | 9 | 10 |
|---|---|---|---|---|---|---|---|---|---|----|

 Extreme limitation**Upper gastrointestinal tract symptoms (e.g. swallowing difficulties, reflux, vomiting):**

Circle the number that best describes the severity of your upper gastrointestinal tract symptoms due to your systemic sclerosis during the last week:

None 

|   |   |   |   |   |   |   |   |   |   |    |
|---|---|---|---|---|---|---|---|---|---|----|
| 0 | 1 | 2 | 3 | 4 | 5 | 6 | 7 | 8 | 9 | 10 |
|---|---|---|---|---|---|---|---|---|---|----|

 Extreme**Pain:**

Circle the number that best describes the pain you felt due to your systemic sclerosis during the last week:

None 

|   |   |   |   |   |   |   |   |   |   |    |
|---|---|---|---|---|---|---|---|---|---|----|
| 0 | 1 | 2 | 3 | 4 | 5 | 6 | 7 | 8 | 9 | 10 |
|---|---|---|---|---|---|---|---|---|---|----|

 Extreme**Fatigue:**

Circle the number that best describes the impact of overall fatigue due to your systemic sclerosis during the last week:

None 

|   |   |   |   |   |   |   |   |   |   |    |
|---|---|---|---|---|---|---|---|---|---|----|
| 0 | 1 | 2 | 3 | 4 | 5 | 6 | 7 | 8 | 9 | 10 |
|---|---|---|---|---|---|---|---|---|---|----|

 Extreme**Lower gastrointestinal tract symptoms (e.g. bloating, diarrhea, constipation, anal incontinence):**

Circle the number that best describes the severity of lower gastrointestinal tract symptoms during the last week:

None 

|   |   |   |   |   |   |   |   |   |   |    |
|---|---|---|---|---|---|---|---|---|---|----|
| 0 | 1 | 2 | 3 | 4 | 5 | 6 | 7 | 8 | 9 | 10 |
|---|---|---|---|---|---|---|---|---|---|----|

 Extreme**Limitations of life choices and activities (e.g. social life, personal care, work):**

Circle the number that best describes how severe the limitations of life choices and activities due to your systemic sclerosis were during the last week:

No 

|   |   |   |   |   |   |   |   |   |   |    |
|---|---|---|---|---|---|---|---|---|---|----|
| 0 | 1 | 2 | 3 | 4 | 5 | 6 | 7 | 8 | 9 | 10 |
|---|---|---|---|---|---|---|---|---|---|----|

 Extreme

**Validation of Scleroid**

COUNTRY \_\_\_\_\_

Patient number /\_\_/\_/

**Body mobility:**

Circle the number that best describes how much your body mobility was affected due to your systemic sclerosis during the last week:

Not affected    0   1   2   3   4   5   6   7   8   9   10    Extremely affected

**Breathlessness:**

Circle the number that best describes how severe your breathlessness due to systemic sclerosis was during the last week:

None   0   1   2   3   4   5   6   7   8   9   10   Extreme

**Digital ulcers:**

Circle the number that best describes how much your digital ulcers affected you overall during the last week:

None   0   1   2   3   4   5   6   7   8   9   10   Extreme

**S6. Global assessment**

Considering **all the ways your systemic sclerosis** has affected you during the last week, circle the number that best describes how you have been doing:

Very good   0   1   2   3   4   5   6   7   8   9   10   Very bad

## Validation of Scleroid

COUNTRY \_\_\_\_\_

Patient number /\_\_/\_/

**S7. We are interested in learning how your illness affects your ability to function in daily life. Please check (X) the one best answer which best describes your usual abilities OVER THE PAST WEEK:**

|                                                                | Without<br>ANY<br>Difficulty <sup>(0)</sup> | With<br>SOME<br>Difficulty <sup>(1)</sup> | With<br>MUCH<br>Difficulty <sup>(2)</sup> | UNABLE<br>To Do <sup>(3)</sup> |
|----------------------------------------------------------------|---------------------------------------------|-------------------------------------------|-------------------------------------------|--------------------------------|
| <b>DRESSING &amp; GROOMING</b>                                 |                                             |                                           |                                           |                                |
| Are you able to:                                               |                                             |                                           |                                           |                                |
| - Dress yourself, including tying shoelaces and doing buttons? | _____                                       | _____                                     | _____                                     | _____                          |
| - Shampoo your hair?                                           | _____                                       | _____                                     | _____                                     | _____                          |
| <b>ARISING</b>                                                 |                                             |                                           |                                           |                                |
| Are you able to:                                               |                                             |                                           |                                           |                                |
| - Stand up from a straight chair?                              | _____                                       | _____                                     | _____                                     | _____                          |
| - Get in and out of bed?                                       | _____                                       | _____                                     | _____                                     | _____                          |
| <b>EATING</b>                                                  |                                             |                                           |                                           |                                |
| Are you able to:                                               |                                             |                                           |                                           |                                |
| - Cut your meat?                                               | _____                                       | _____                                     | _____                                     | _____                          |
| - Lift a full cup or glass to your mouth?                      | _____                                       | _____                                     | _____                                     | _____                          |
| - Open a new milk carton?                                      | _____                                       | _____                                     | _____                                     | _____                          |
| <b>WALKING</b>                                                 |                                             |                                           |                                           |                                |
| Are you able to:                                               |                                             |                                           |                                           |                                |
| - Walk outdoors on flat ground?                                | _____                                       | _____                                     | _____                                     | _____                          |
| - Climb up five steps?                                         | _____                                       | _____                                     | _____                                     | _____                          |

**Please check any AIDS OR DEVICES that you usually use for any of these activities:**

|                  |                                                                                          |
|------------------|------------------------------------------------------------------------------------------|
| _____ Cane       | _____ Devices used for dressing (button hook, zipper pull, long-handled shoe horn, etc.) |
| _____ Walker     | _____ Built up or special utensils                                                       |
| _____ Crutches   | _____ Special or built up chair                                                          |
| _____ Wheelchair | _____ Other (Specify: _____)                                                             |

**Please check any categories for which you usually need HELP FROM ANOTHER PERSON:**

|                             |               |
|-----------------------------|---------------|
| _____ Dressing and Grooming | _____ Eating  |
| _____ Arising               | _____ Walking |

## Validation of Scleroid

COUNTRY \_\_\_\_\_

Patient number /\_\_/\_/

**Please check the response which best describes your usual abilities OVER THE PAST WEEK:**

|                                                                                           | Without<br>ANY<br><u>Difficulty</u> <sup>(0)</sup> | With<br>SOME<br><u>Difficulty</u> <sup>(1)</sup> | With<br>MUCH<br><u>Difficulty</u> <sup>(2)</sup> | UNABLE<br><u>To Do</u> <sup>(3)</sup> |
|-------------------------------------------------------------------------------------------|----------------------------------------------------|--------------------------------------------------|--------------------------------------------------|---------------------------------------|
| <b>HYGIENE</b>                                                                            |                                                    |                                                  |                                                  |                                       |
| Are you able to:                                                                          |                                                    |                                                  |                                                  |                                       |
| - Wash and dry your body?                                                                 | _____                                              | _____                                            | _____                                            | _____                                 |
| - Take a tub bath?                                                                        | _____                                              | _____                                            | _____                                            | _____                                 |
| - Get on and off the toilet?                                                              | _____                                              | _____                                            | _____                                            | _____                                 |
| <b>REACH</b>                                                                              |                                                    |                                                  |                                                  |                                       |
| Are you able to:                                                                          |                                                    |                                                  |                                                  |                                       |
| - Reach and get down a 5 pound object (such as a bag of sugar) from just above your head? | _____                                              | _____                                            | _____                                            | _____                                 |
| - Bend down to pick up clothing from the floor?                                           | _____                                              | _____                                            | _____                                            | _____                                 |
| <b>GRIP</b>                                                                               |                                                    |                                                  |                                                  |                                       |
| Are you able to:                                                                          |                                                    |                                                  |                                                  |                                       |
| - Open car doors?                                                                         | _____                                              | _____                                            | _____                                            | _____                                 |
| - Open jars which have previously been opened?                                            | _____                                              | _____                                            | _____                                            | _____                                 |
| - Turn faucets on and off?                                                                | _____                                              | _____                                            | _____                                            | _____                                 |
| <b>ACTIVITIES</b>                                                                         |                                                    |                                                  |                                                  |                                       |
| Are you able to:                                                                          |                                                    |                                                  |                                                  |                                       |
| - Run errands and shop?                                                                   | _____                                              | _____                                            | _____                                            | _____                                 |
| - Get in and out of a car?                                                                | _____                                              | _____                                            | _____                                            | _____                                 |
| - Do chores such as vacuuming or yard work?                                               | _____                                              | _____                                            | _____                                            | _____                                 |

**Please check any AIDS OR DEVICES that you usually use for any of these activities:**

|                                               |                                           |
|-----------------------------------------------|-------------------------------------------|
| _____ Raised toilet seat                      | _____ Bathtub bar                         |
| _____ Bathtub seat                            | _____ Long-handled appliances for reach   |
| _____ Jar opener (for jars previously opened) | _____ Long-handled appliances in bathroom |
| _____ Other (Specify: _____)                  |                                           |

**Please check any categories for which you usually need HELP FROM ANOTHER PERSON:**

|               |                                   |
|---------------|-----------------------------------|
| _____ Hygiene | _____ Gripping and opening things |
| _____ Reach   | _____ Errands and chores          |

**IN THE PAST WEEK**, how much have your intestinal problems interfered with your daily activities?



**Validation of SclerolD**

COUNTRY \_\_\_\_\_

Patient number /\_\_/\_\_/



Does not interfere

Very severe limitation

**IN THE PAST WEEK**, how much have your breathing problems interfered with your daily activities?

Does not interfere

Very severe limitation

**IN THE PAST WEEK**, how much has Raynaud's interfered with your daily activities?

Does not interfere

Very severe limitation

**IN THE PAST WEEK**, how much have your finger ulcers interfered with your daily activities?

Does not interfere

Very severe limitation

S8. EQ-5D

**By placing a tick in each group below, please indicate which statements best describe your own health state today.****Mobility**I have no problems in walking about ☐I have some problems in walking about ☐I am confined to bed ☐**Self-care**I have no problems with self-care ☐I have some problems washing or dressing myself ☐I am unable to wash or dress myself ☐**Usual activities (eg work, study, housework, family or leisure activities)**

## Validation of Scleroid

COUNTRY \_\_\_\_\_

Patient number /\_\_/\_/

I have no problems with performing my usual activities ☐I have some problems with performing my usual activities ☐I am unable to perform my usual activities ☐**Pain / discomfort**I have no pain or discomfort ☐I have moderate pain or discomfort ☐I have extreme pain or discomfort ☐**Anxiety / depression**I am not anxious or depressed ☐I am moderately anxious or depressed ☐I am extremely anxious or depressed ☐**P10. Overall assessment of health status (SF-36)**

|                                                                             |   |
|-----------------------------------------------------------------------------|---|
| 1. In general, would you say your health is:                                |   |
| Excellent                                                                   | 1 |
| Very good                                                                   | 2 |
| Good                                                                        | 3 |
| Fair                                                                        | 4 |
| Poor                                                                        | 5 |
| 2. Compared to one year ago, how would you rate your health in general now? |   |
| Much better now than one year ago                                           | 1 |
| Somewhat better now than one year ago                                       | 2 |
| About the same                                                              | 3 |
| Somewhat worse now than one year ago                                        | 4 |
| Much worse now than one year ago                                            | 5 |

The following items are about activities you might do during a typical day. Does **your health now limit you** in these activities? If so, how much?

**(Circle One Number on Each Line)**Yes,  
Limited a  
LotYes,  
Limited a  
LittleNo, Not  
limited at  
All

### Validation of Scleroid

| COUNTRY _____                                                                                              | Patient number / __/__/ |     |     |
|------------------------------------------------------------------------------------------------------------|-------------------------|-----|-----|
| 3. <b>Vigorous activities</b> , such as running, lifting heavy objects, participating in strenuous sports  | [1]                     | [2] | [3] |
| 4. <b>Moderate activities</b> , such as moving a table, pushing a vacuum cleaner, bowling, or playing golf | [1]                     | [2] | [3] |
| 5. Lifting or carrying groceries                                                                           | [1]                     | [2] | [3] |
| 6. Climbing <b>several</b> flights of stairs                                                               | [1]                     | [2] | [3] |
| 7. Climbing <b>one</b> flight of stairs                                                                    | [1]                     | [2] | [3] |
| 8. Bending, kneeling, or stooping                                                                          | [1]                     | [2] | [3] |
| 9. Walking <b>more than a mile</b>                                                                         | [1]                     | [2] | [3] |
| 10. Walking <b>several blocks</b>                                                                          | [1]                     | [2] | [3] |
| 11. Walking <b>one block</b>                                                                               | [1]                     | [2] | [3] |
| 12. Bathing or dressing yourself                                                                           | [1]                     | [2] | [3] |

During the **past 4 weeks**, have you had any of the following problems with your work or other regular daily activities **as a result of your physical health**?

**(Circle One Number on Each Line)**

|                                                                                                       | Yes | No |
|-------------------------------------------------------------------------------------------------------|-----|----|
| 13. Cut down the amount of time you spent on work or other activities                                 | 1   | 2  |
| 14. <b>Accomplished less</b> than you would like                                                      | 1   | 2  |
| 15. Were limited in the <b>kind</b> of work or other activities                                       | 1   | 2  |
| 16. Had <b>difficulty</b> performing the work or other activities (for example, it took extra effort) | 1   | 2  |

During the **past 4 weeks**, have you had any of the following problems with your work or other regular daily activities **as a result of any emotional problems**(such as feeling depressed or anxious)? **(Circle One Number on Each Line)**

Yes No

---

**Validation of Scleroid****COUNTRY** \_\_\_\_\_**Patient number** /\_\_/\_/17. Cut down the **amount of time** you spent on work or other activities      1      218. **Accomplished less** than you would like      1      219. Didn't do work or other activities as **carefully** as usual      1      2

20. During the **past 4 weeks**, to what extent has your physical health or emotional problems interfered with your normal social activities with family, friends, neighbors, or groups? **(Circle One Number)**

Not at all      1

Slightly      2

Moderately      3

Quite a bit      4

Extremely      5

21. How much **bodily** pain have you had during the **past 4 weeks**?

**(Circle One Number)**

None      1

Very mild      2

Mild      3

Moderate      4

Severe      5

Very severe      6

22. During the **past 4 weeks**, how much did **pain** interfere with your normal work (including both work outside the home and housework)? **(Circle One Number)**

Not at all      1

A little bit      2

Moderately      3

## Validation of Scleroid

COUNTRY \_\_\_\_\_

Patient number / \_\_/ \_\_/

Quite a bit                      4

Extremely                      5

These questions are about how you feel and how things have been with you **during the past 4 weeks**. For each question, please give the one answer that comes closest to the way you have been feeling. **(Circle One Number on Each Line)**

How much of the time during the **past 4 weeks** . . .

|                                                                         | All of<br>the<br>Time | Most<br>of the<br>Time | A Good<br>Bit of the<br>Time | Some<br>of the<br>Time | A Little<br>of the<br>Time | None<br>of the<br>Time |
|-------------------------------------------------------------------------|-----------------------|------------------------|------------------------------|------------------------|----------------------------|------------------------|
| 23. Did you feel full of pep?                                           | 1                     | 2                      | 3                            | 4                      | 5                          | 6                      |
| 24. Have you been a very nervous person?                                | 1                     | 2                      | 3                            | 4                      | 5                          | 6                      |
| 25. Have you felt so down in the dumps that nothing could cheer you up? | 1                     | 2                      | 3                            | 4                      | 5                          | 6                      |
| 26. Have you felt calm and peaceful?                                    | 1                     | 2                      | 3                            | 4                      | 5                          | 6                      |
| 27. Did you have a lot of energy?                                       | 1                     | 2                      | 3                            | 4                      | 5                          | 6                      |
| 28. Have you felt downhearted and blue?                                 | 1                     | 2                      | 3                            | 4                      | 5                          | 6                      |
| 29. Did you feel worn out?                                              | 1                     | 2                      | 3                            | 4                      | 5                          | 6                      |
| 30. Have you been a happy person?                                       | 1                     | 2                      | 3                            | 4                      | 5                          | 6                      |
| 31. Did you feel tired?                                                 | 1                     | 2                      | 3                            | 4                      | 5                          | 6                      |

32. During the **past 4 weeks**, how much of the time has your **physical health or emotional problems** interfered with your social activities (like visiting with friends, relatives, etc.)? **(Circle One Number)**

All of the time                      1

### Validation of Scleroid

COUNTRY \_\_\_\_\_

Patient number / \_\_ / \_\_ /

Most of the time                      2

Some of the time                      3

A little of the time                      4

None of the time                      5

How TRUE or FALSE is each of the following statements for you.

**(Circle One Number on Each Line)**

|                                                          | Definitely<br>True | Mostly<br>True | Don't<br>Know | Mostly<br>False | Definitely<br>False |
|----------------------------------------------------------|--------------------|----------------|---------------|-----------------|---------------------|
| 33. I seem to get sick a little easier than other people | 1                  | 2              | 3             | 4               | 5                   |
| 34. I am as healthy as anybody I know                    | 1                  | 2              | 3             | 4               | 5                   |
| 35. I expect my health to get worse                      | 1                  | 2              | 3             | 4               | 5                   |
| 36. My health is excellent                               | 1                  | 2              | 3             | 4               | 5                   |

|                                                    |
|----------------------------------------------------|
| <b>Thank you for filling in this questionnaire</b> |
|----------------------------------------------------|

---

**Validation of Scleroid**

COUNTRY \_\_\_\_\_

Patient number /\_\_/\_/

**SENSITIVITY TO CHANGE STUDY- PHYSICIAN CRF**

(to be filled at visits occurring 6, respectively 12 months after the baseline visit)

**S1. Date of the visit**     /\_\_/\_/ /\_\_/\_/ 20\_\_  
                                          day    month    year
**S2. Do you confirm the main inclusion criteria?**

Yes

No

 S2.1. Patient had active disease AT BASELINE as defined by  
 the physician ..... ☐ ..... ☐

 S2.2. A follow-up visit at 6 and 12 months or at least at 12 months  
 after baseline is feasible..... ☐ ..... ☐
*A negative answer results in the non-inclusion of the patient in the sensitivity to change study.*


---

**S3. SSc characteristics**

**Please make sure that all necessary items of the corresponding EUSTAR dataset are evaluated and filled into the system (clinical features, laboratory values etc.) AND the patient fills in the necessary questionnaires/CRF.**

**S4. Physician's global assessment of SSc**

Considering all the ways systemic sclerosis has affected your patient during the last week, circle the number that best describes how he/she has been doing:

|           |   |   |   |   |   |   |   |   |   |   |    |          |
|-----------|---|---|---|---|---|---|---|---|---|---|----|----------|
| Very good | 0 | 1 | 2 | 3 | 4 | 5 | 6 | 7 | 8 | 9 | 10 | Very bad |
|-----------|---|---|---|---|---|---|---|---|---|---|----|----------|
